# Supplementary material for: High phenoxazinone synthase activity of two mononuclear cis-dichloro cobalt(ii) complexes with a rigid pyridyl scaffold
Source: Royal Society of Chemistry journal article supplement (doi:10.1039/d1nj03992j), 2021-12-02
Supplement: d1nj03992j1.pdf [file d1nj03992j1.pdf]

## Supporting Information

### **High Phenoxazinone Synthase Activity of Two Mononuclear *cis*-Dichloro Cobalt(II) Complexes with Rigid Pyridyl Scaffold**

Arabinda Muley,<sup>†</sup> Kalai Selvan Karumban,<sup>†</sup> Sadananda Kumbhakar, Bishnubasu Giri and Somnath Maji\*

*Department of Chemistry, Indian Institute of Technology, Hyderabad, Kandi, Sangareddy 502284, Telangana, India*

<sup>†</sup> These authors contributed equally to this work.

Email address: [smaji@chy.iith.ac.in](mailto:smaji@chy.iith.ac.in) (Somnath Maji)

## Figure captions

**Fig. S1.**  $^1\text{H}$  NMR spectra of  $\text{L}^1$  in  $\text{CDCl}_3$  in room temperature.

**Fig. S2.** FT-IR spectra of (a) [1] and (b) [2].

**Fig. S3.** Increase in phenoxazinone absorbance during the catalytic oxidation of (a)  $0.10 \times 10^{-2}$  M, (b)  $0.25 \times 10^{-2}$  M, (c)  $0.50 \times 10^{-2}$  M and (d)  $0.75 \times 10^{-2}$  M *o*-aminophenol with  $1 \times 10^{-4}$  M complex [1] at room temperature (25 °C) (left) and respective rate constant determination (right).

**Fig. S4.** Increase in phenoxazinone absorbance during the catalytic oxidation of (a)  $0.10 \times 10^{-2}$  M, (b)  $0.25 \times 10^{-2}$  M, (c)  $0.50 \times 10^{-2}$  M and (d)  $0.75 \times 10^{-2}$  M *o*-aminophenol with  $1 \times 10^{-4}$  M complex [2] at room temperature (25 °C) (left) and respective rate constant determination (right).

**Fig. S5.** Initial rate versus substrate concentration plot for the oxidation of *o*-aminophenol catalyzed by [2] at room temperature (25 °C).

**Fig. S6.** Lineweaver-Burk plots for the oxidation of *o*-aminophenol catalyzed by [2] at room temperature (25 °C).

**Fig. S7.** *o*-aminophenol oxidation of  $10^{-2}$  M substrate by  $10^{-4}$  M of  $\text{CoCl}_2 \cdot 6\text{H}_2\text{O}$  in methanol at room temperature (25 °C) (a) and zoomed version (b).

**Fig. S8.** *o*-aminophenol oxidation of  $10^{-2}$  M substrate in methanol only (blank test) at room temperature (25 °C) (a) and zoomed version (b).

**Fig. S9.** ESI-MS spectra for the formation of phenoxazinone upon addition of complex to *o*-aminophenol.

**Fig. S10.** Evidence of adduct formation along with peroxide found via mass spectrometry (a), (c) and (e) (zoomed of (b)) for [1] and [2] with their simulated mass spectra (b), (d) and (f).

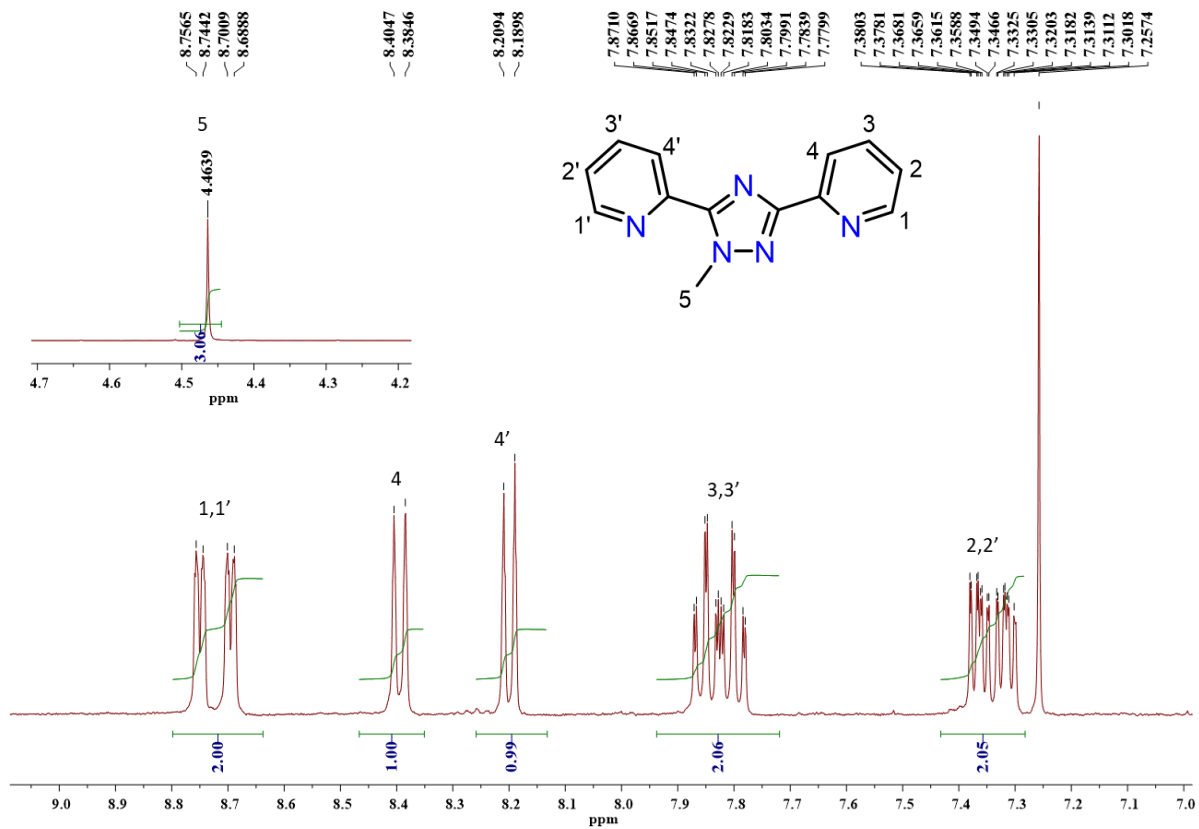

**Fig. S1** <sup>1</sup>H NMR spectra of **L<sup>1</sup>** in CDCl<sub>3</sub> in room temperature.

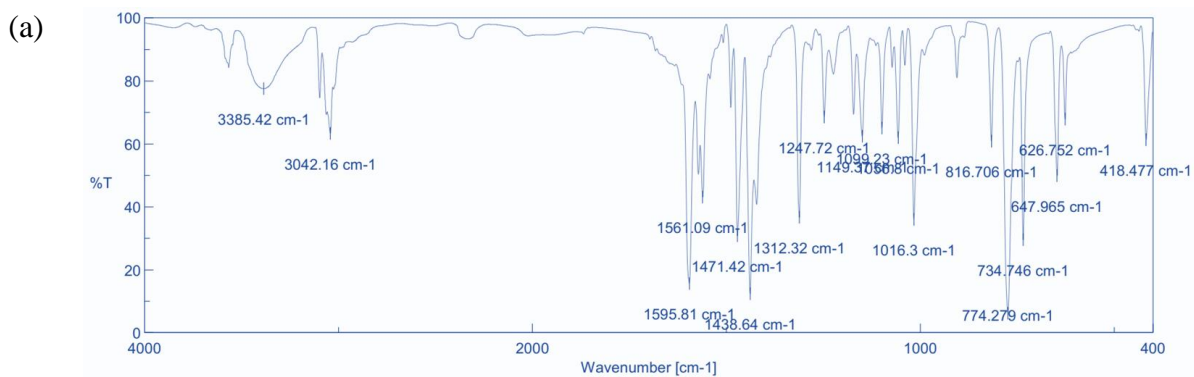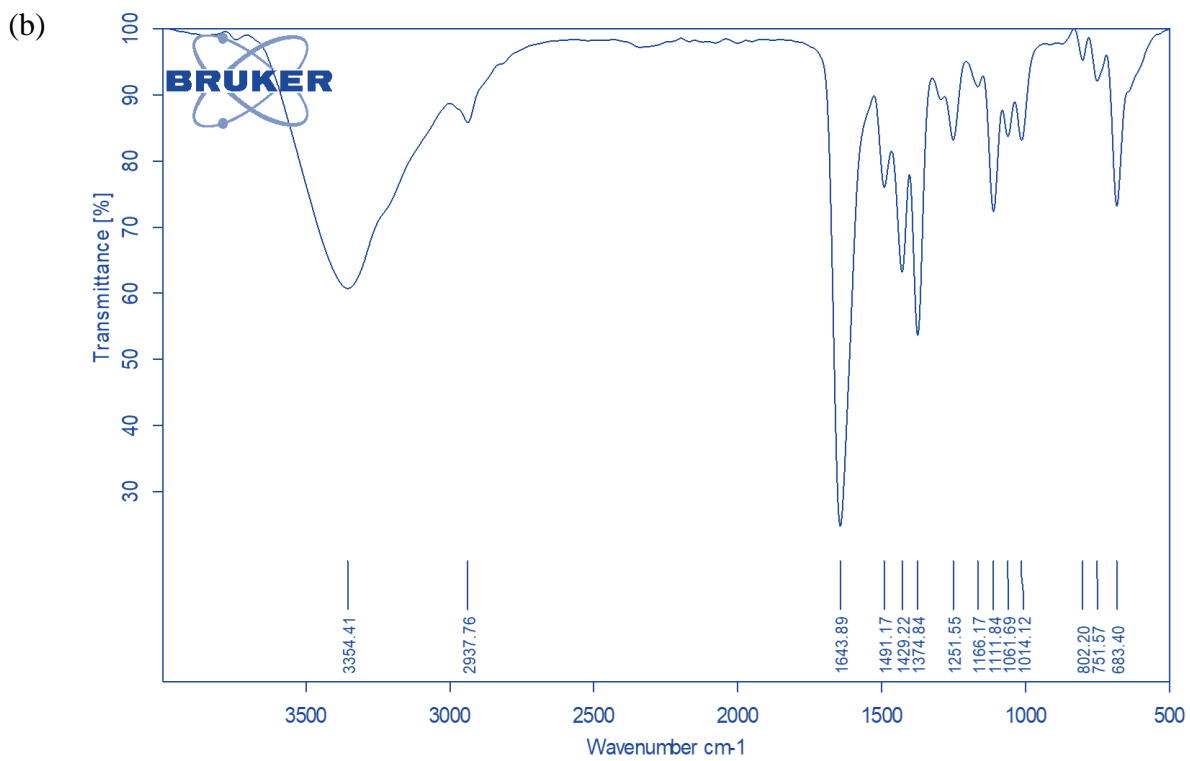

**Fig. S2.** FT-IR spectra of (a) [1] and (b) [2].

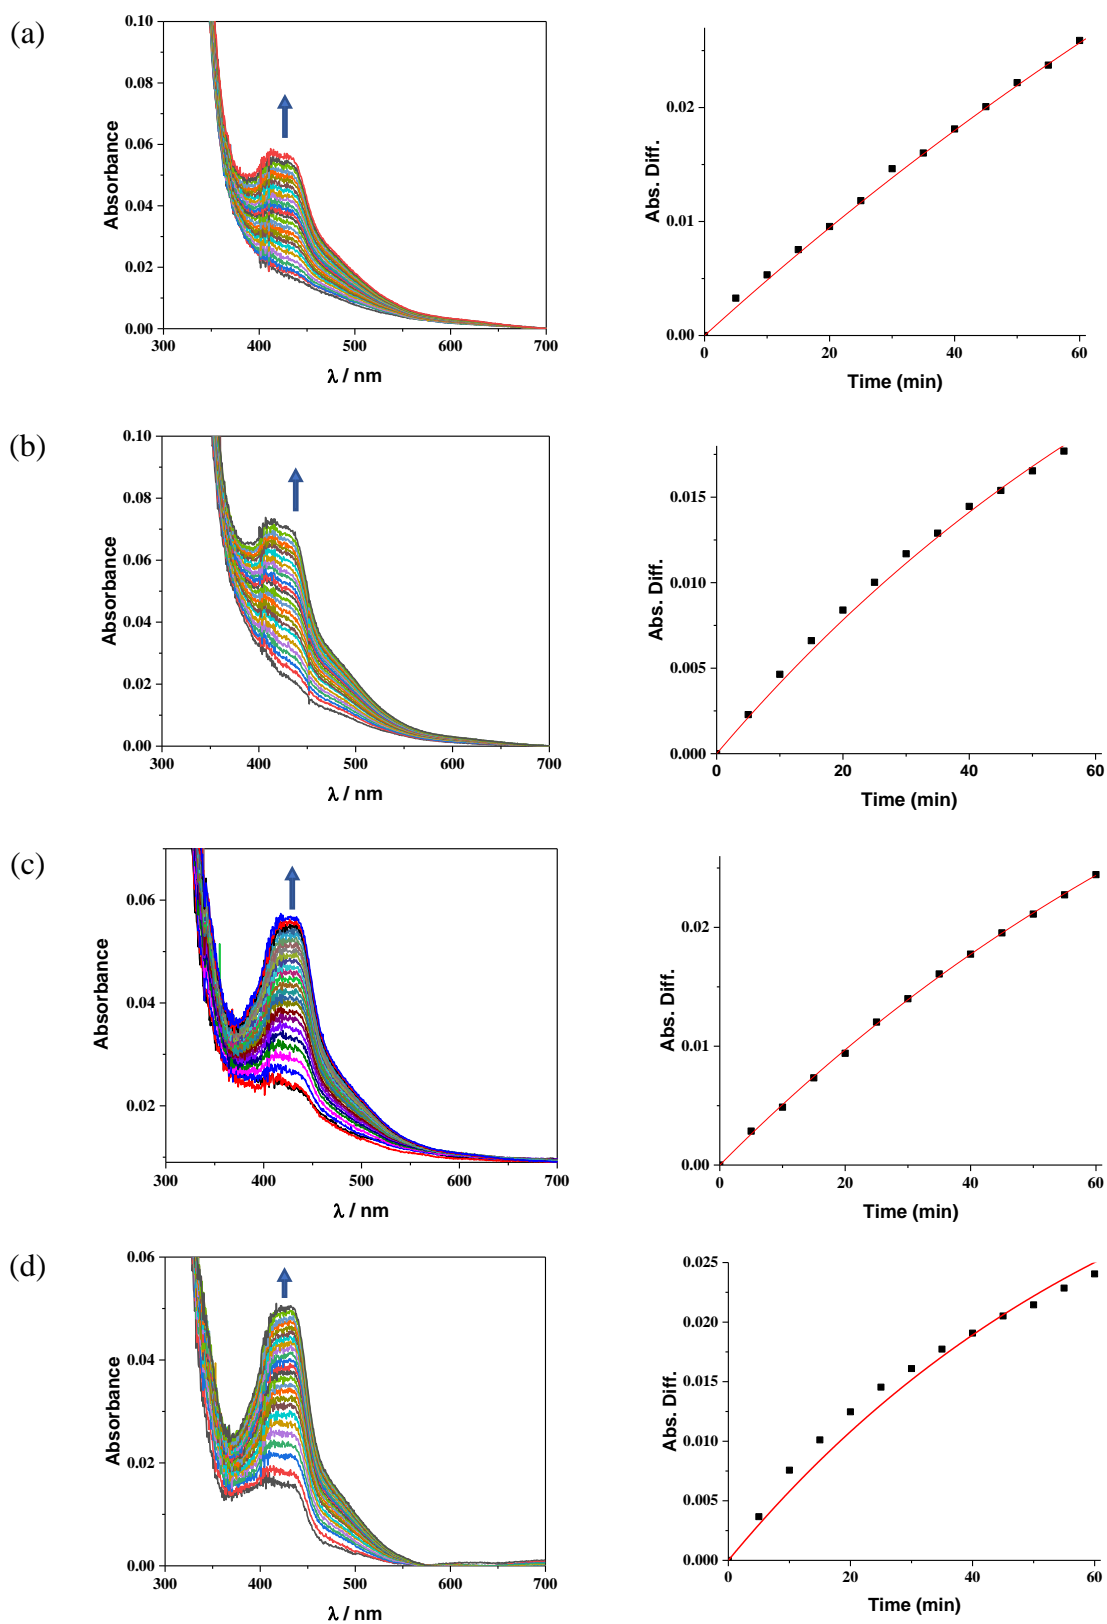

**Fig. S3.** Increase in phenoxazinone absorbance during the catalytic oxidation of (a)  $0.10 \times 10^{-2}$  M, (b)  $0.25 \times 10^{-2}$  M, (c)  $0.50 \times 10^{-2}$  M and (d)  $0.75 \times 10^{-2}$  M *o*-aminophenol with  $1 \times 10^{-4}$  M complex [1] at room temperature (25 °C) (left) and respective rate constant determination (right).

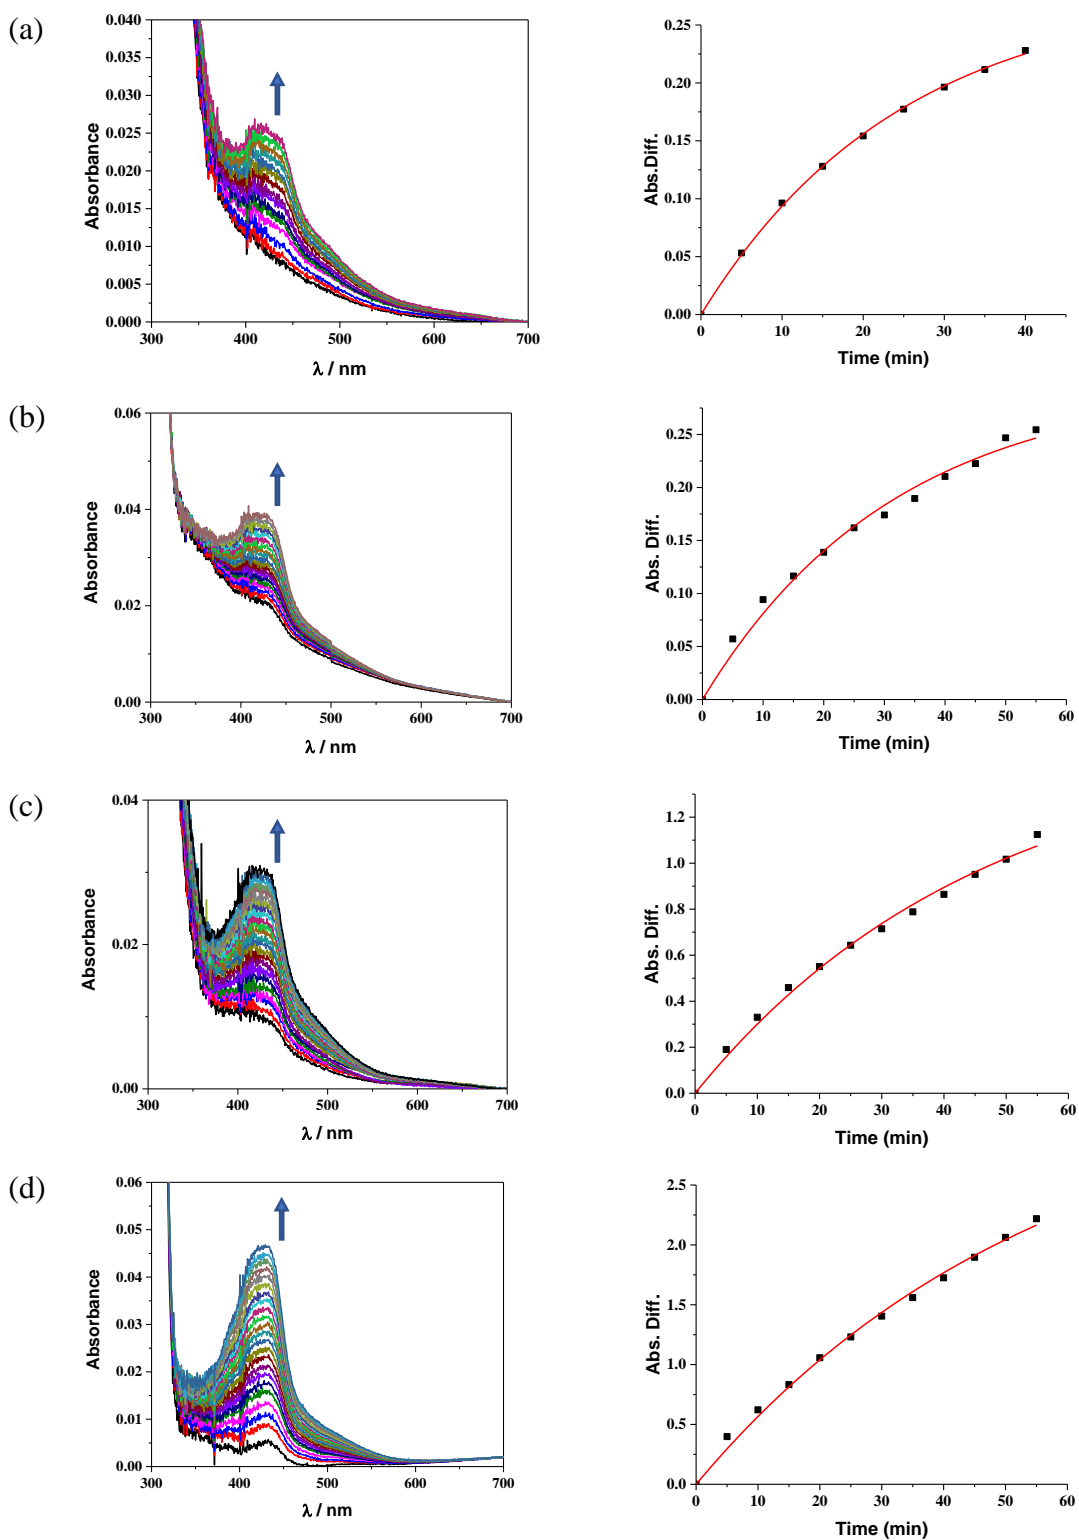

**Fig. S4.** Increase in phenoxazinone absorbance during the catalytic oxidation of (a)  $0.10 \times 10^{-2}$  M, (b)  $0.25 \times 10^{-2}$  M, (c)  $0.50 \times 10^{-2}$  M and (d)  $0.75 \times 10^{-2}$  M *o*-aminophenol with  $1 \times 10^{-4}$  M complex [2] at room temperature (25 °C) (left) and respective rate constant determination (right).

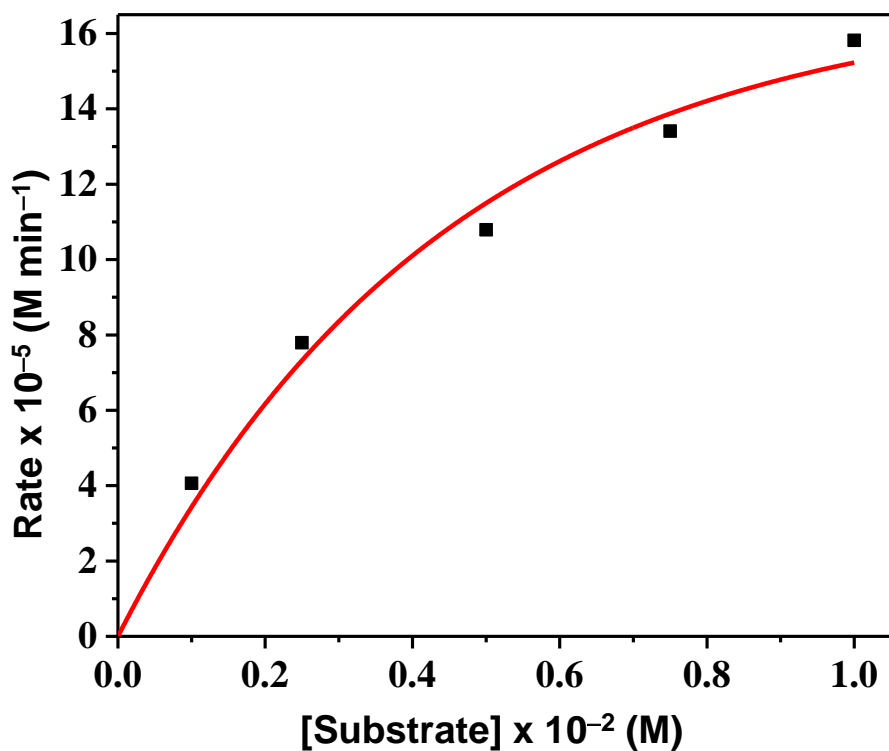

**Fig. S5** Initial rate versus substrate concentration plot for the oxidation of *o*-aminophenol catalyzed by [2] at room temperature (25 °C).

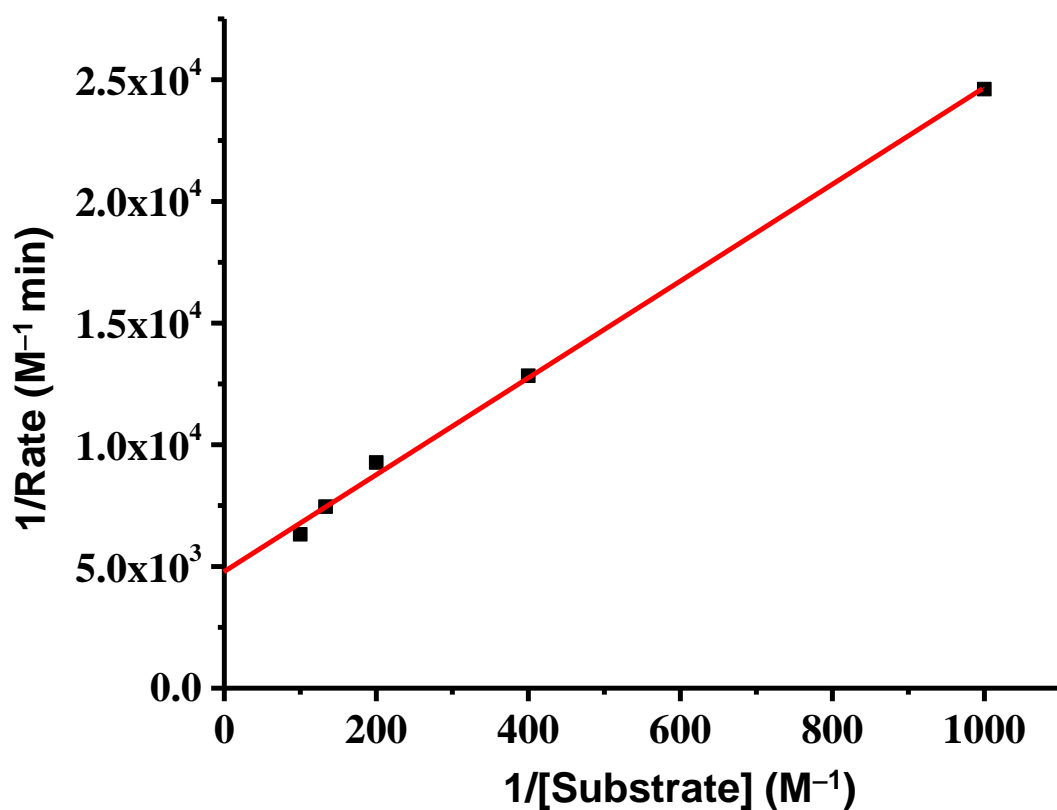

**Fig. S6** Lineweaver-Burk plots for the oxidation of *o*-aminophenol catalyzed by [2] at room temperature (25 °C).

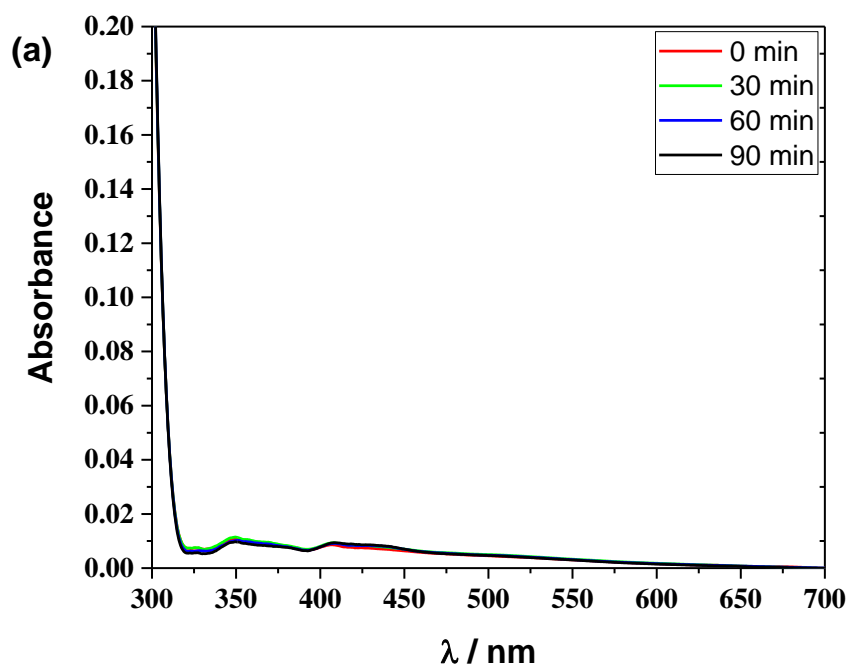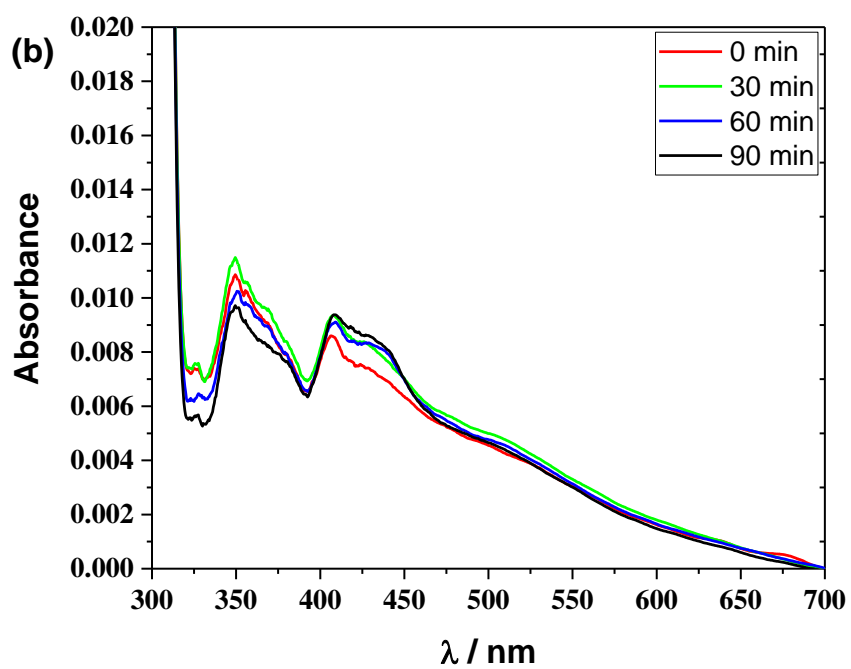

**Fig. S7**  $o$ -aminophenol oxidation of  $10^{-2}$  M substrate by  $10^{-4}$  M of  $\text{CoCl}_2 \cdot 6\text{H}_2\text{O}$  in methanol at room temperature ( $25^\circ\text{C}$ ) (a) and zoomed version (b).



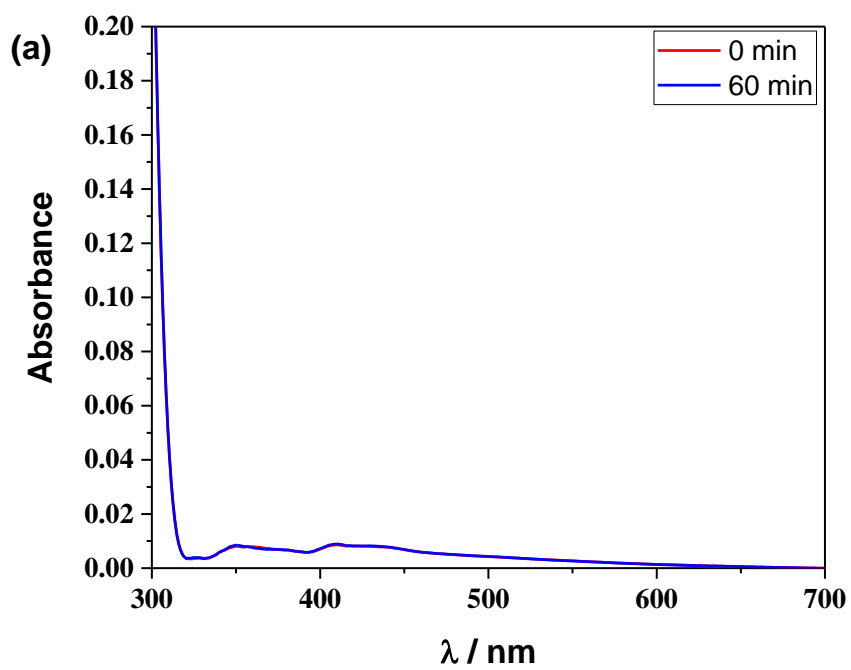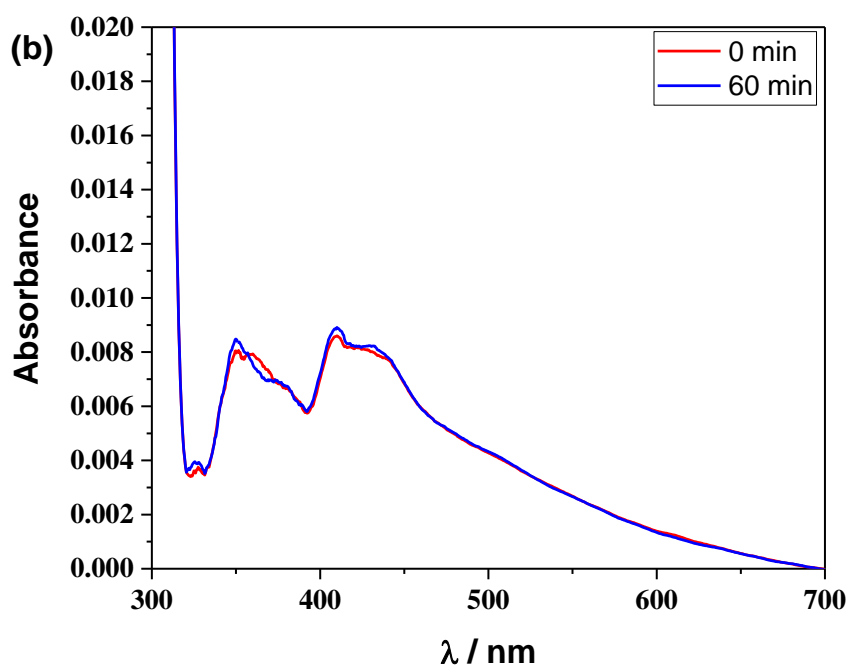

**Fig. S8.** *o*-aminophenol oxidation of 10<sup>-2</sup> M substrate in methanol only (blank test) at room temperature (25 °C) (a) and zoomed version (b).

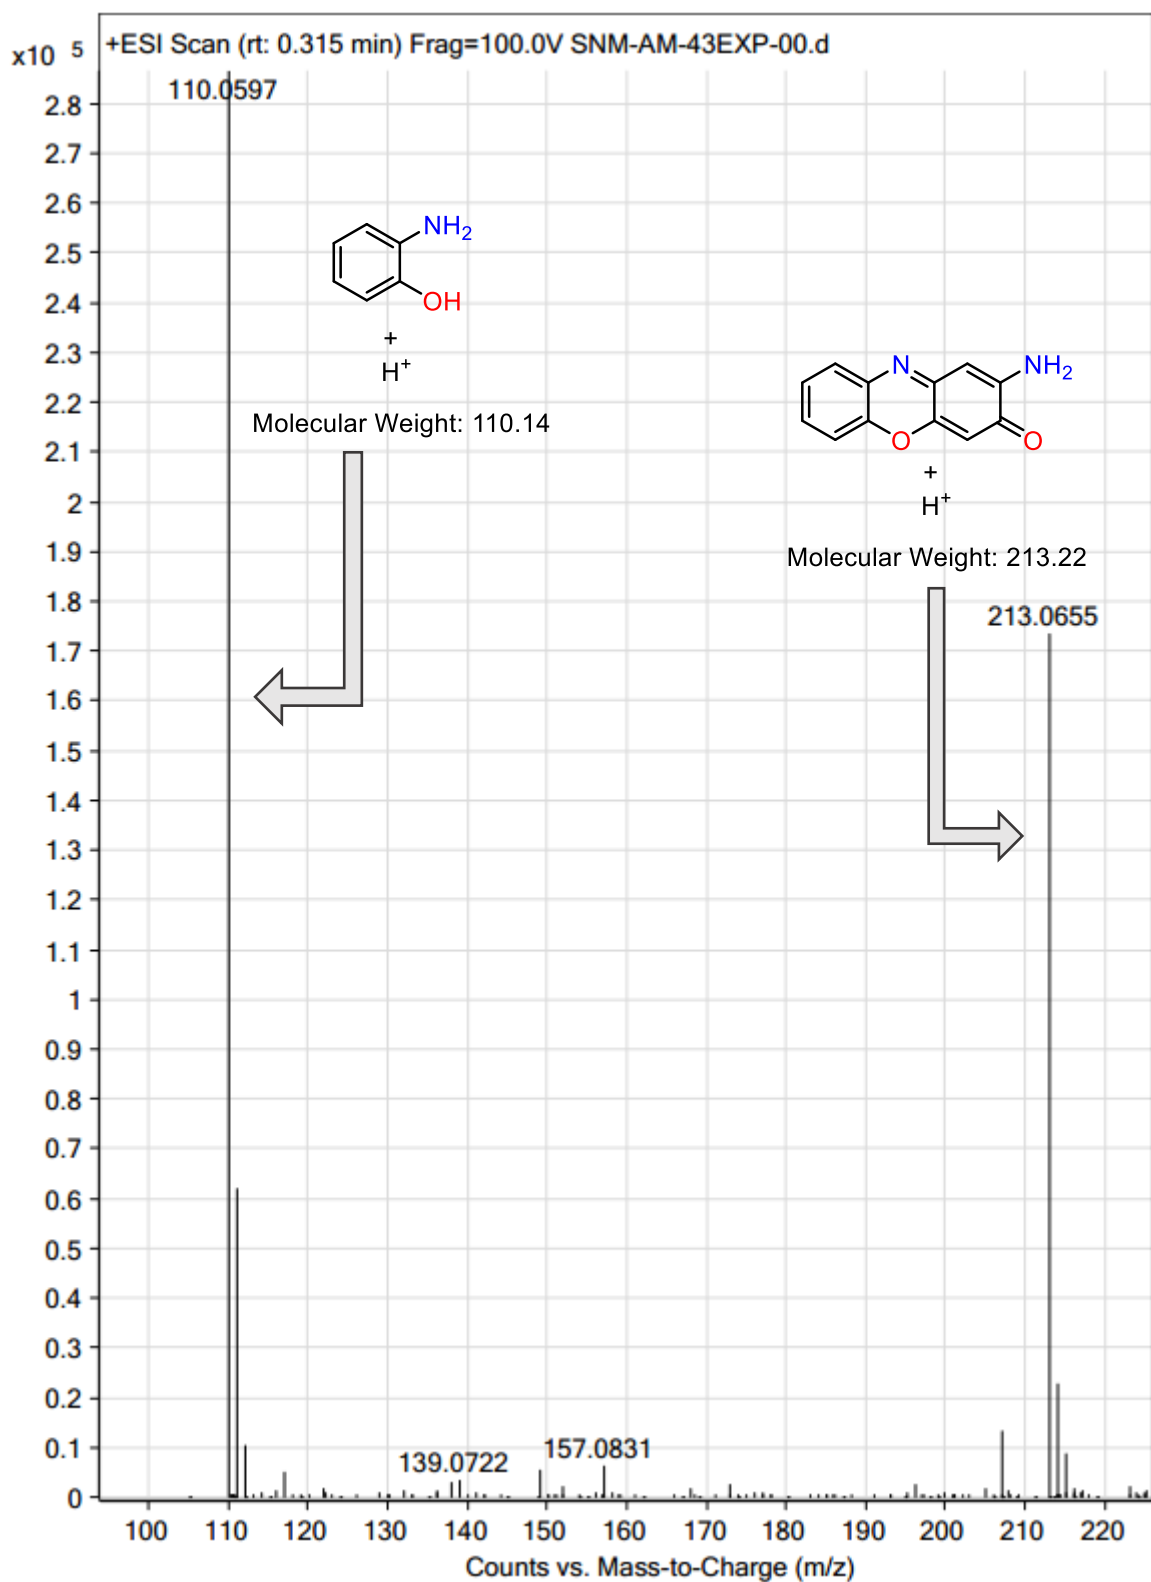

**Fig. S9** ESI-MS spectra for the formation of phenoxazinone upon addition of complex to *o*-aminophenol.

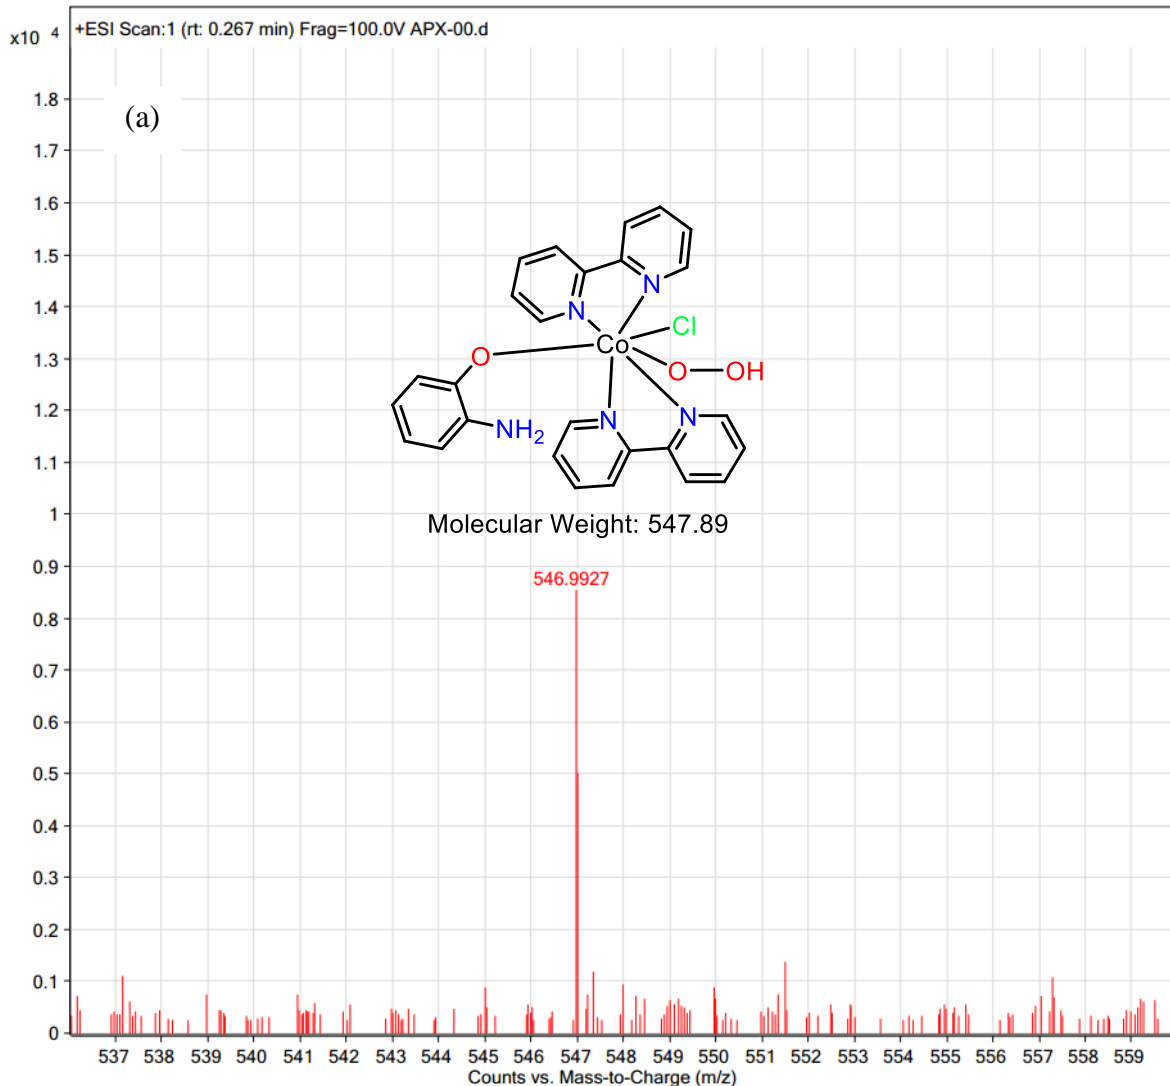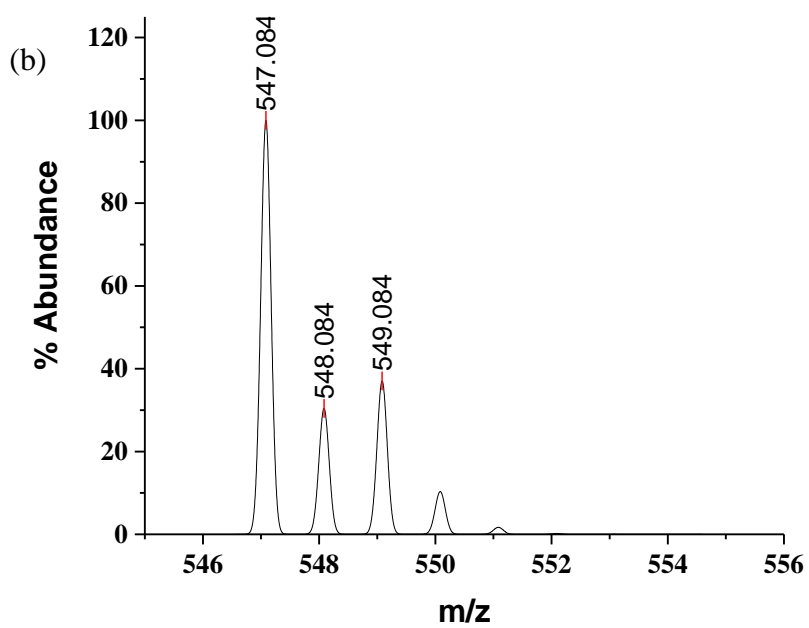

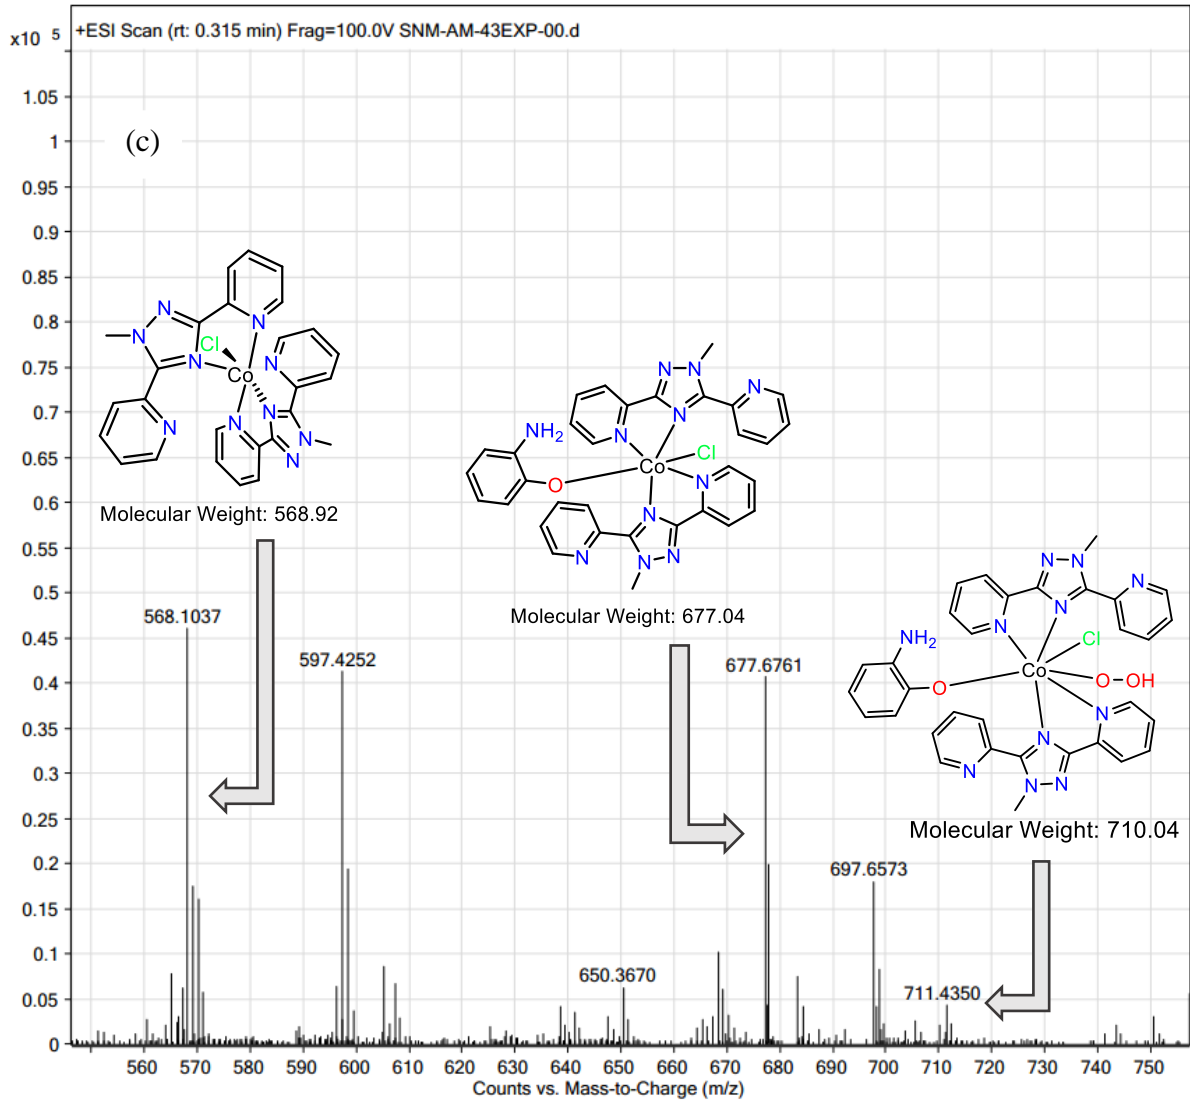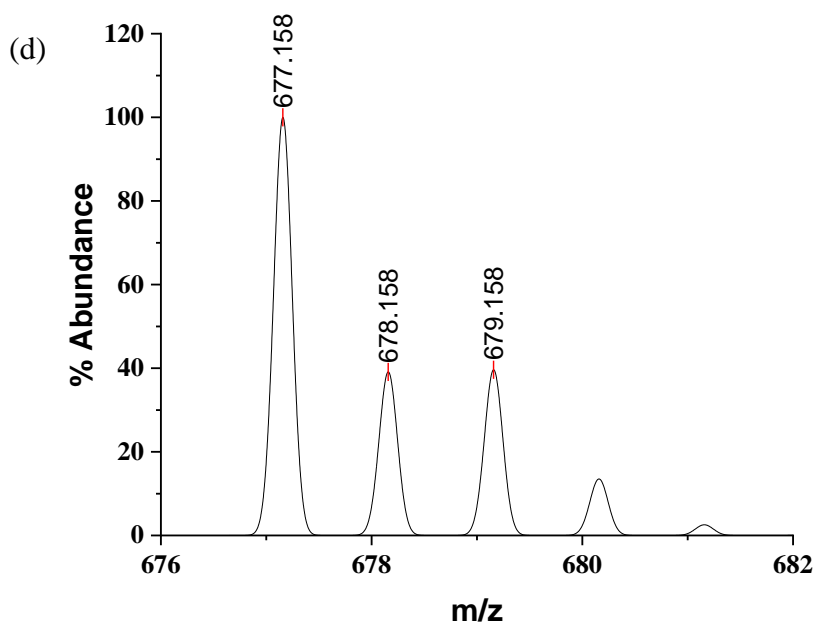

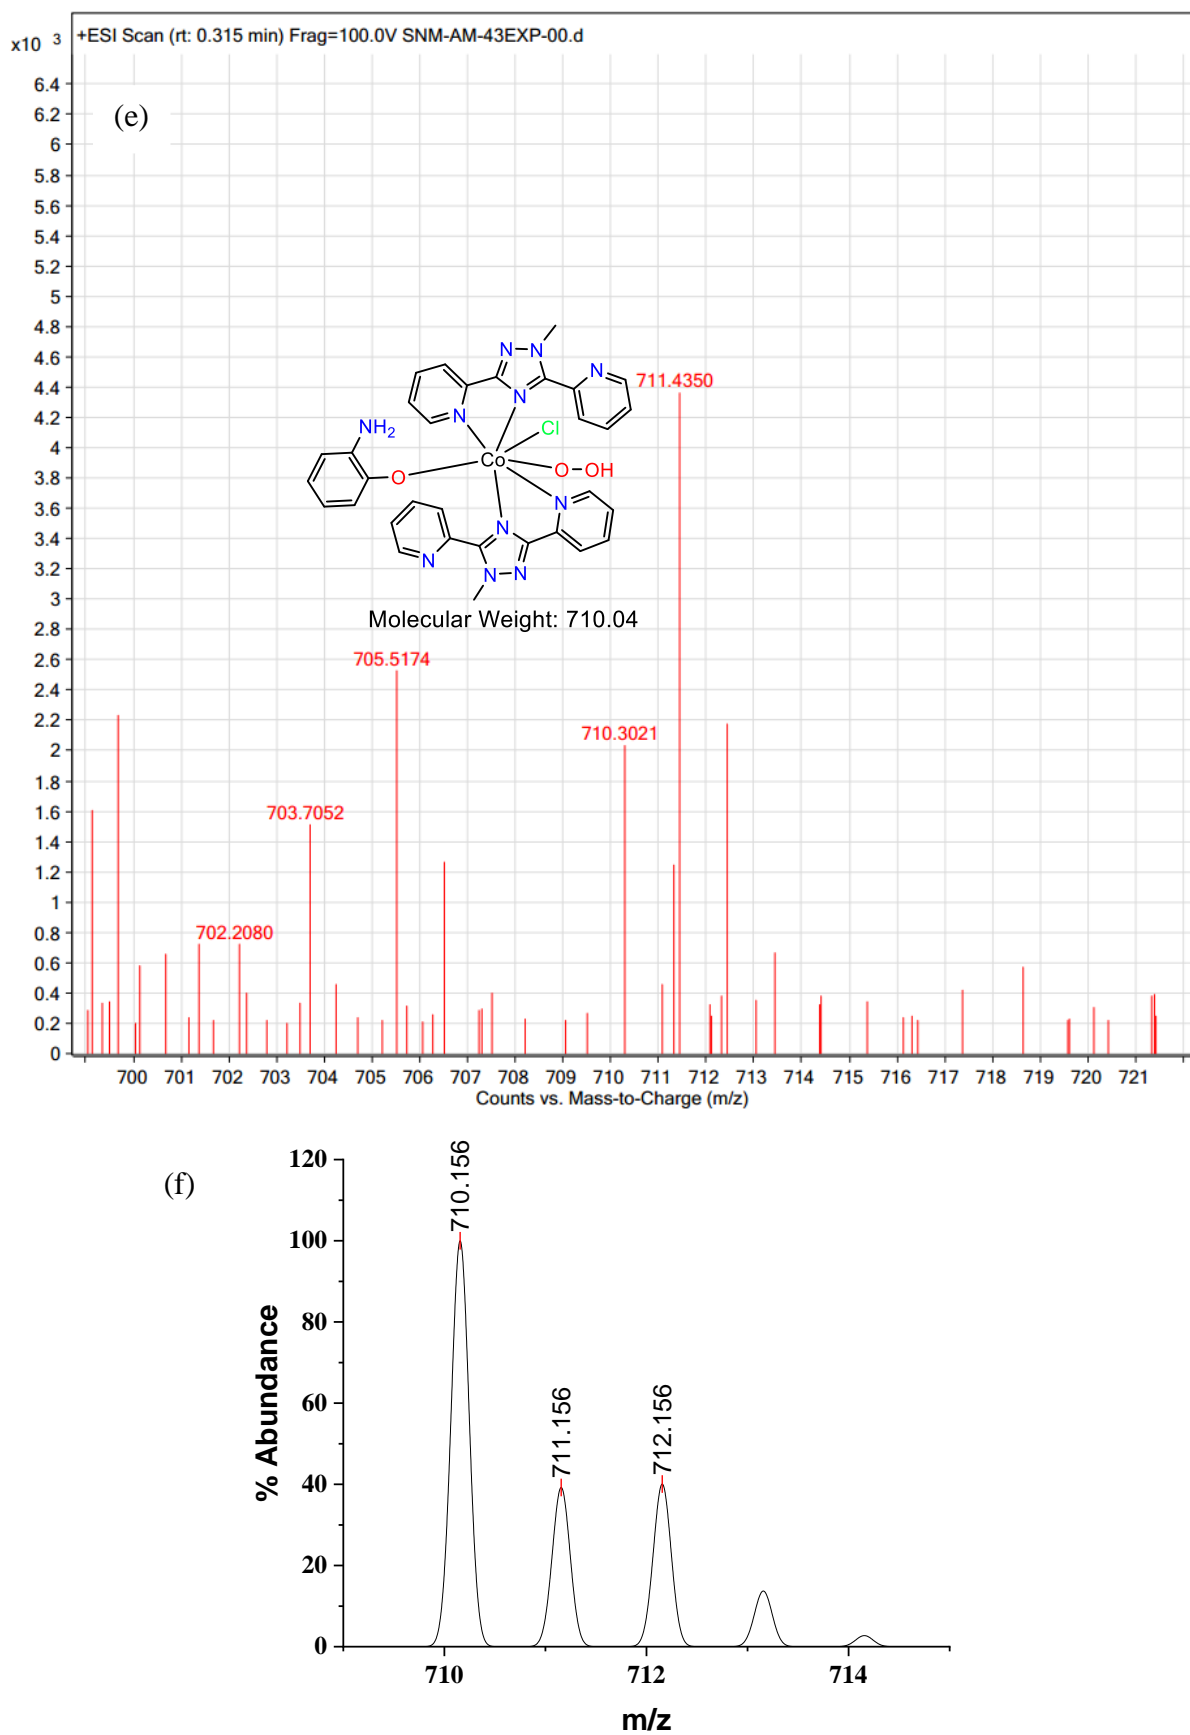

**Fig. S10** Evidence of adduct formation along with peroxide found via mass spectrometry (a), (c) and (e) (zoomed of (b)) for [1] and [2] with their simulated mass spectra (b), (d) and (f).
